# Supplementary material for: Observation of piezoelectricity in a lead-free Cs2AgBiBr6 perovskite: a new entrant in the energy harvesting arena
Source: Royal Society of Chemistry journal article supplement (doi:10.1039/d4nr01230e), 2024-01-01
Supplement: d4nr01230e1.pdf [file d4nr01230e1.pdf]

## Supporting Information

### Observation of Piezoelectricity in Lead-free $\text{Cs}_2\text{AgBiBr}_6$ Perovskite: A New Entrant in Energy Harvesting Arena

Tufan Paul<sup>1#</sup>, Aditi Sahoo<sup>2#</sup>, Soumen Maiti<sup>3</sup>, Suvankar Mandal<sup>4</sup>, Souvik Bhattacharjee<sup>4</sup>,  
Avishek Maiti<sup>5</sup>, Kalyan Kumar Chattopadhyay\*<sup>1,4</sup>

<sup>1</sup>*School of Material Science and Nanotechnology, Jadavpur University, Kolkata-700032, India*

<sup>2</sup>*CSIR- Central Glass and Ceramic Research Institute, Kolkata-700032, India*

<sup>3</sup>*St Thomas College of Engineering & Technology, Kolkata, 700023, India*

<sup>4</sup>*Department of Physics, Jadavpur University, Kolkata, 700032, India*

<sup>5</sup> *S. N. Bose National Centre for Basic Sciences, Salt Lake, Kolkata 700106, India*

\*Corresponding author Email: [kalyan\\_chattopadhyay@yahoo.com](mailto:kalyan_chattopadhyay@yahoo.com)

# Current affiliation: Institut national de la recherche scientifique (INRS), EMT Centre, Varennes, Quebec J3X 1S2, Canada

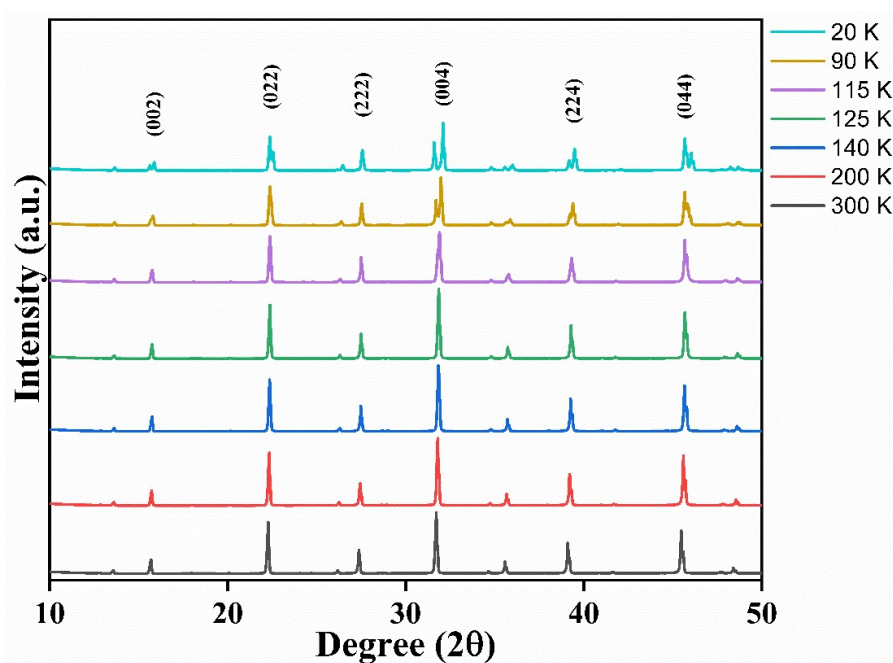

**Figure S1:** Low temperature dependent XRD of  $\text{Cs}_2\text{AgBiBr}_6$ .

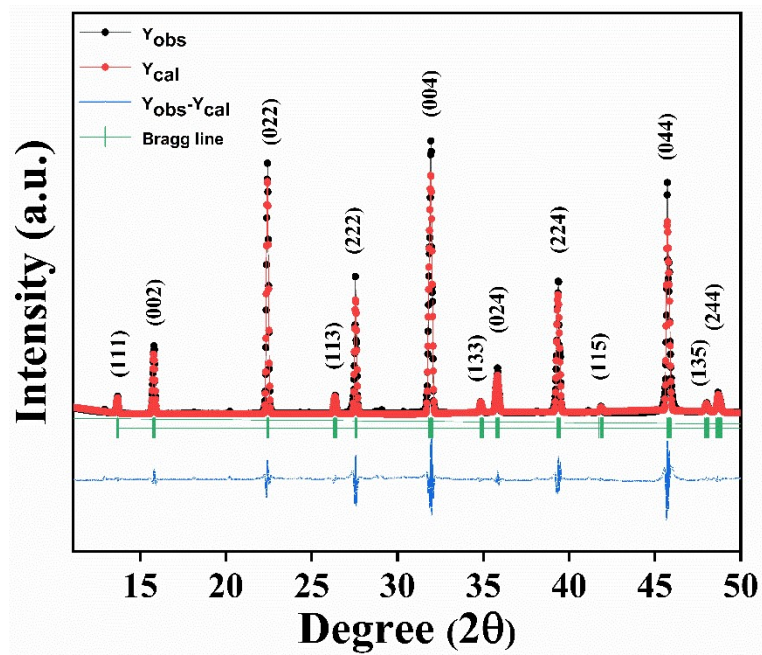

*Figure S2: Refined XRD data of  $\text{Cs}_2\text{AgBiBr}_6$  at 115 K in tetragonal lattice system with  $I4/m$  space group.*

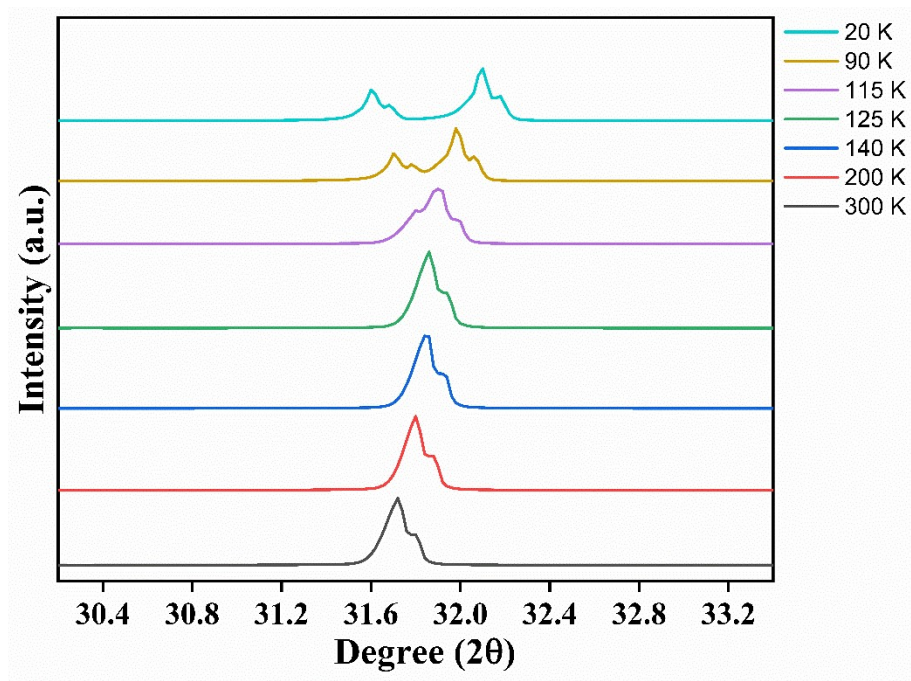

*Figure S3: Low temperature XRD of  $\text{Cs}_2\text{AgBiBr}_6$  at the phase transition region.*

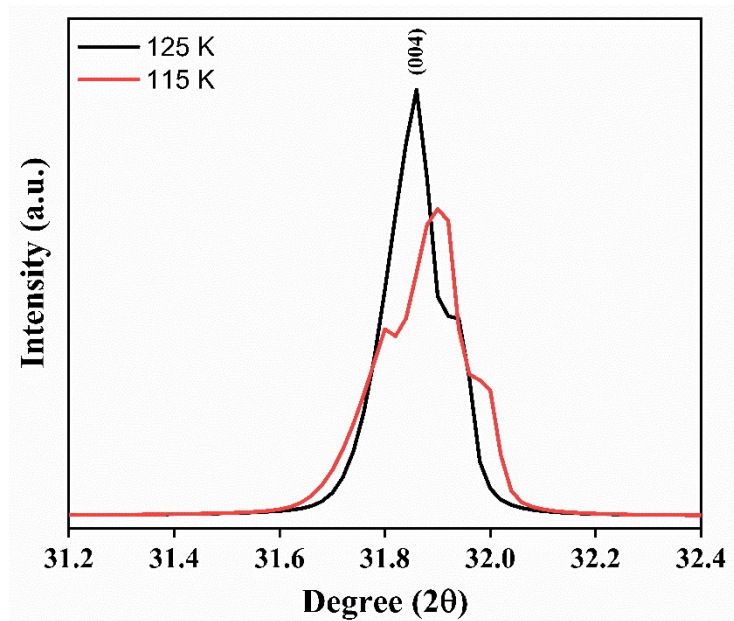

*Figure S4: Zoom view of 31.73° peak at low temperature XRD of  $\text{Cs}_2\text{AgBiBr}_6$ .*

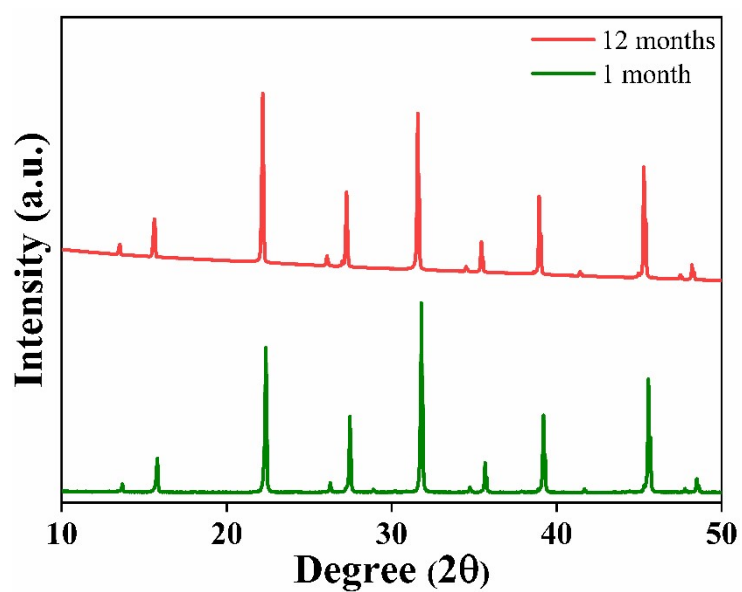

*Figure S5: Time dependent XRD stability of  $\text{Cs}_2\text{AgBiBr}_6$ .*

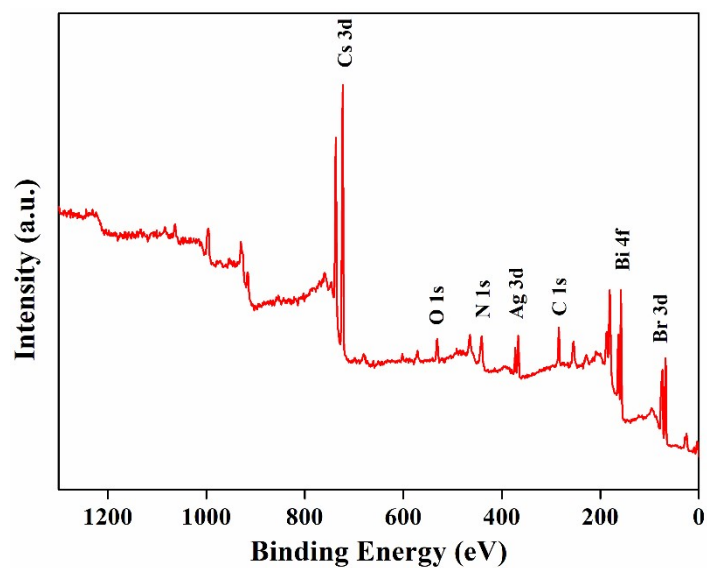

**Figure S6:** XPS survey scan of  $\text{Cs}_2\text{AgBiBr}_6$ .

**Table S1:** Comparison of Piezoresponse of various halide perovskites

| S. No.    | Material                                                       | Maximum piezoelectric Amplitude response | Applied electric bias        | Reference        |
|-----------|----------------------------------------------------------------|------------------------------------------|------------------------------|------------------|
| 1.        | $\text{FASnI}_3$                                               | ~400 pm                                  | $\pm 10$ V                   | 1                |
| 2.        | $\gamma\text{-CsPbI}_3$                                        | ~350 pm                                  | $\pm 10$ V                   | 2                |
| 3.        | $\text{CsGeBr}_3$                                              | ~70 pm                                   | $\pm 8$ V                    | 3                |
| 4.        | $\text{PEA}_2\text{MA}_{n-1}\text{Pb}_n\text{I}_{3n+1}$ (n =5) | ~400 pm                                  | $\pm 10$ V                   | 4                |
| 5.        | $\text{MAPb}(\text{I}_{1-x}\text{Br}_x)_3$                     | ~90 pm                                   | $\pm 5$ V                    | 5                |
| 6.        | $\text{DMAACdCl}_3$                                            | ~175 pm                                  | $\pm 60$ V                   | 6                |
| 7.        | $(\text{TMAEA})\text{Pb}_2\text{Cl}_6$                         | ~600 pm                                  | $\pm 20$ V                   | 7                |
| <b>8.</b> | <b><math>\text{Cs}_2\text{AgBiBr}_6</math></b>                 | <b>~272 pm</b>                           | <b><math>\pm 20</math> V</b> | <b>this work</b> |

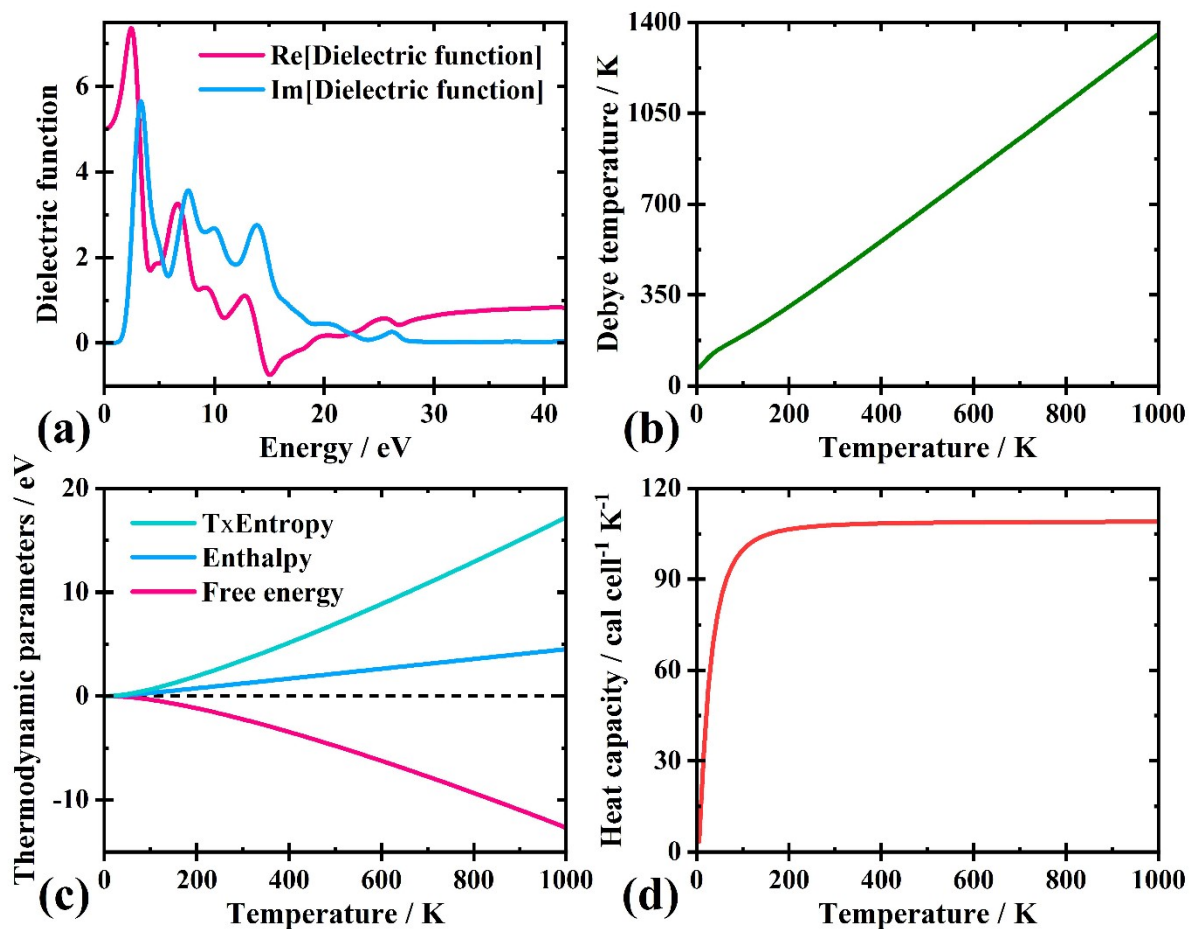

**Figure S7:** (a) Energy dispersive real and imaginary parts of optical dielectric function; (b) Debye temperature versus absolute temperature ( $T$ ); (c)  $T \times$  entropy, enthalpy, and free energy as a function of  $T$ ; (d) heat capacity versus  $T$  plot.



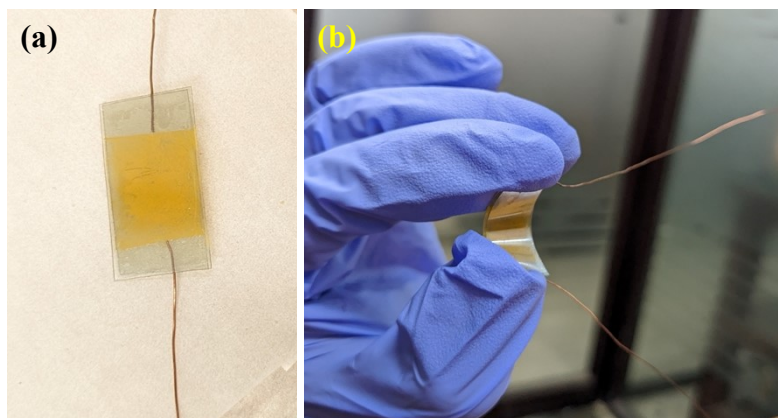

**Figure S8:** Picture of the PNG device (a) without bending (b) with bending.

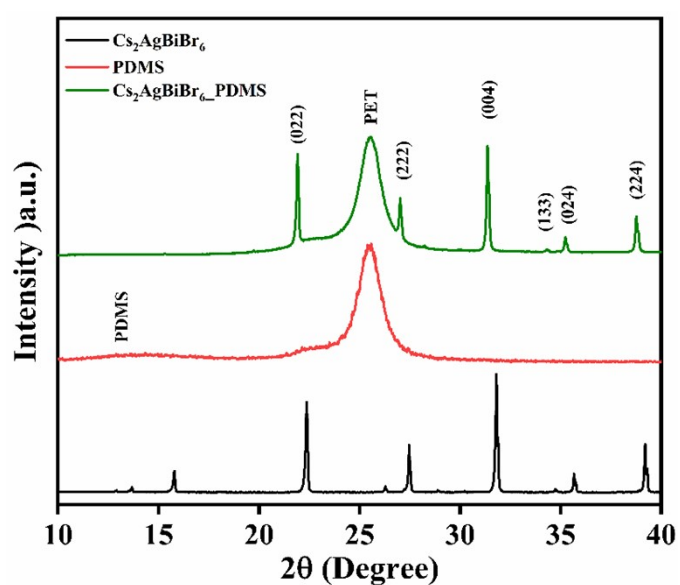

**Figure S9:** XRD of pure PDMS,  $\text{Cs}_2\text{AgBiBr}_6$  crystals with prepared film

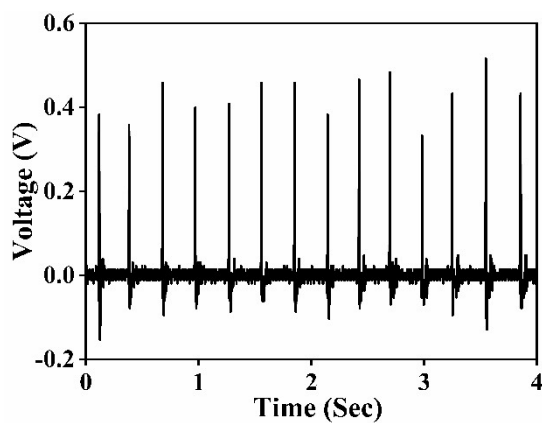

**Figure S10:** Output performance registered from PDMS

## Group theoretical analysis using *VIBRATE!*

$\text{Cs}_2\text{AgBiBr}_6$

**Hall Symbol:** -F 4 2 3

**Space Group:** F m 3 m ( $O_h^5$ )

**Space Group Number:** 225

**a** = 11.2712

**b** = 11.2712

**c** = 11.2712

$\alpha$  = 90

$\beta$  = 90

$\gamma$  = 90

**Crystal System:** Cubic

**Setting:** Standard

**Point Group:** m3m ( $O_h$ )

### Atomic Coordinates

|     |    |          |          |          |
|-----|----|----------|----------|----------|
| 24e | 1  | 0.250310 | 0.000000 | 0.000000 |
| 24e | 2  | 0.250310 | 0.500000 | 0.500000 |
| 24e | 3  | 0.750310 | 0.000000 | 0.500000 |
| 24e | 4  | 0.750310 | 0.500000 | 0.000000 |
| 24e | 5  | 0.749690 | 0.000000 | 0.000000 |
| 24e | 6  | 0.749690 | 0.500000 | 0.500000 |
| 24e | 7  | 0.249690 | 0.000000 | 0.500000 |
| 24e | 8  | 0.249690 | 0.500000 | 0.000000 |
| 24e | 9  | 0.000000 | 0.250310 | 0.000000 |
| 24e | 10 | 0.000000 | 0.750310 | 0.500000 |
| 24e | 11 | 0.500000 | 0.250310 | 0.500000 |
| 24e | 12 | 0.500000 | 0.750310 | 0.000000 |
| 24e | 13 | 0.000000 | 0.749690 | 0.000000 |
| 24e | 14 | 0.000000 | 0.249690 | 0.500000 |
| 24e | 15 | 0.500000 | 0.749690 | 0.500000 |
| 24e | 16 | 0.500000 | 0.249690 | 0.000000 |
| 24e | 17 | 0.000000 | 0.000000 | 0.749690 |
| 24e | 18 | 0.000000 | 0.500000 | 0.249690 |
| 24e | 19 | 0.500000 | 0.000000 | 0.249690 |
| 24e | 20 | 0.500000 | 0.500000 | 0.749690 |
| 24e | 21 | 0.000000 | 0.000000 | 0.250310 |
| 24e | 22 | 0.000000 | 0.500000 | 0.750310 |
| 24e | 23 | 0.500000 | 0.000000 | 0.750310 |
| 24e | 24 | 0.500000 | 0.500000 | 0.250310 |
| 4a  | 25 | 0.000000 | 0.000000 | 0.000000 |
| 4a  | 26 | 0.000000 | 0.500000 | 0.500000 |
| 4a  | 27 | 0.500000 | 0.000000 | 0.500000 |
| 4a  | 28 | 0.500000 | 0.500000 | 0.000000 |
| 4b  | 29 | 0.500000 | 0.000000 | 0.000000 |
| 4b  | 30 | 0.500000 | 0.500000 | 0.500000 |
| 4b  | 31 | 0.000000 | 0.000000 | 0.500000 |
| 4b  | 32 | 0.000000 | 0.500000 | 0.000000 |
| 8c  | 33 | 0.250000 | 0.250000 | 0.250000 |
| 8c  | 34 | 0.250000 | 0.750000 | 0.750000 |
| 8c  | 35 | 0.750000 | 0.250000 | 0.750000 |
| 8c  | 36 | 0.750000 | 0.750000 | 0.250000 |
| 8c  | 37 | 0.750000 | 0.750000 | 0.750000 |
| 8c  | 38 | 0.750000 | 0.250000 | 0.250000 |
| 8c  | 39 | 0.250000 | 0.750000 | 0.250000 |
| 8c  | 40 | 0.250000 | 0.250000 | 0.750000 |

## Lattice Centring Operators

---

1: 0.000000 0.500000 0.500000

---

2: 0.500000 0.000000 0.500000

---

3: 0.500000 0.500000 0.000000

---

4: 0.000000 0.000000 0.000000

---

|                                             |
|---------------------------------------------|
| <b>Non-Magnetic Case <math>k = 0</math></b> |
|---------------------------------------------|

## Symmetry Operators

---

| <b>R</b> | <b>t</b> | <b>x,y,z</b> | <b>Operator: 1 (E)</b> |
|----------|----------|--------------|------------------------|
| 1        | 0 0      | 0.000        |                        |
| 0        | 1 0      | 0.000        |                        |
| 0        | 0 1      | 0.000        |                        |

---

| <b>R</b> | <b>t</b> | <b>-y,-z,x</b> | <b>Operator: 3 (C<sub>3</sub>)</b> |
|----------|----------|----------------|------------------------------------|
| 0        | -1 0     | 0.000          |                                    |
| 0        | 0 -1     | 0.000          |                                    |
| 1        | 0 0      | 0.000          |                                    |

---

| <b>R</b> | <b>t</b> | <b>z,-x,-y</b> | <b>Operator: 3 (C<sub>3</sub>)</b> |
|----------|----------|----------------|------------------------------------|
| 0        | 0 1      | 0.000          |                                    |
| -1       | 0 0      | 0.000          |                                    |
| 0        | -1 0     | 0.000          |                                    |

---

| <b>R</b> | <b>t</b> | <b>-y,z,-x</b> | <b>Operator: 3 (C<sub>3</sub>)</b> |
|----------|----------|----------------|------------------------------------|
| 0        | -1 0     | 0.000          |                                    |
| 0        | 0 1      | 0.000          |                                    |
| -1       | 0 0      | 0.000          |                                    |

---

| <b>R</b> | <b>t</b> | <b>-z,-x,y</b> | <b>Operator: 3 (C<sub>3</sub>)</b> |
|----------|----------|----------------|------------------------------------|
| 0        | 0 -1     | 0.000          |                                    |
| -1       | 0 0      | 0.000          |                                    |
| 0        | 1 0      | 0.000          |                                    |

---

| <b>R</b> | <b>t</b> | <b>-z,x,-y</b> | <b>Operator: 3 (C<sub>3</sub>)</b> |
|----------|----------|----------------|------------------------------------|
| 0        | 0 -1     | 0.000          |                                    |
| 1        | 0 0      | 0.000          |                                    |
| 0        | -1 0     | 0.000          |                                    |



---

| <b>R</b> | <b>t</b> | <b>y,-z,-x</b> | <b>Operator: 3 (C<sub>3</sub>)</b> |
|----------|----------|----------------|------------------------------------|
| 0        | 1        | 0              | 0.000                              |
| 0        | 0        | -1             | 0.000                              |
| -1       | 0        | 0              | 0.000                              |

---

| <b>R</b> | <b>t</b> | <b>z,x,y</b> | <b>Operator: 3 (C<sub>3</sub>)</b> |
|----------|----------|--------------|------------------------------------|
| 0        | 0        | 1            | 0.000                              |
| 1        | 0        | 0            | 0.000                              |
| 0        | 1        | 0            | 0.000                              |

---

| <b>R</b> | <b>t</b> | <b>y,z,x</b> | <b>Operator: 3 (C<sub>3</sub>)</b> |
|----------|----------|--------------|------------------------------------|
| 0        | 1        | 0            | 0.000                              |
| 0        | 0        | 1            | 0.000                              |
| 1        | 0        | 0            | 0.000                              |

---

| <b>R</b> | <b>t</b> | <b>-z,-y,-x</b> | <b>Operator: 2 (C<sub>2</sub>)</b> |
|----------|----------|-----------------|------------------------------------|
| 0        | 0        | -1              | 0.000                              |
| 0        | -1       | 0               | 0.000                              |
| -1       | 0        | 0               | 0.000                              |

---

| <b>R</b> | <b>t</b> | <b>z,-y,x</b> | <b>Operator: 2 (C<sub>2</sub>)</b> |
|----------|----------|---------------|------------------------------------|
| 0        | 0        | 1             | 0.000                              |
| 0        | -1       | 0             | 0.000                              |
| 1        | 0        | 0             | 0.000                              |

---

| <b>R</b> | <b>t</b> | <b>-x,-z,-y</b> | <b>Operator: 2 (C<sub>2</sub>)</b> |
|----------|----------|-----------------|------------------------------------|
| -1       | 0        | 0               | 0.000                              |
| 0        | 0        | -1              | 0.000                              |
| 0        | -1       | 0               | 0.000                              |

---

| <b>R</b> | <b>t</b> | <b>-x,z,y</b> | <b>Operator: 2 (C<sub>2</sub>)</b> |
|----------|----------|---------------|------------------------------------|
| -1       | 0        | 0             | 0.000                              |
| 0        | 0        | 1             | 0.000                              |
| 0        | 1        | 0             | 0.000                              |

---

| <b>R</b> | <b>t</b> | <b>-y,-x,-z</b> | <b>Operator: 2 (C<sub>2</sub>)</b> |
|----------|----------|-----------------|------------------------------------|
| 0        | -1       | 0               | 0.000                              |
| -1       | 0        | 0               | 0.000                              |
| 0        | 0        | -1              | 0.000                              |

---

| <b>R</b> | <b>t</b> | <b>y,x,-z</b> | <b>Operator: 2 (C<sub>2</sub>)</b> |
|----------|----------|---------------|------------------------------------|
| 0        | 1        | 0             | 0.000                              |
| 1        | 0        | 0             | 0.000                              |
| 0        | 0        | -1            | 0.000                              |

---

| <b>R</b> | <b>t</b> | <b>-y,x,z</b> | <b>Operator: 4 (C<sub>4</sub>)</b> |
|----------|----------|---------------|------------------------------------|
| 0        | -1       | 0             | 0.000                              |
| 1        | 0        | 0             | 0.000                              |

0 0 1 0.000

---

| <b>R</b> | <b>t</b> | <b>y,-x,z</b> | <b>Operator: 4 (C<sub>4</sub>)</b> |
|----------|----------|---------------|------------------------------------|
| 0 1 0    | 0.000    |               |                                    |
| -1 0 0   | 0.000    |               |                                    |
| 0 0 1    | 0.000    |               |                                    |

---

| <b>R</b> | <b>t</b> | <b>x,-z,y</b> | <b>Operator: 4 (C<sub>4</sub>)</b> |
|----------|----------|---------------|------------------------------------|
| 1 0 0    | 0.000    |               |                                    |
| 0 0 -1   | 0.000    |               |                                    |
| 0 1 0    | 0.000    |               |                                    |

---

| <b>R</b> | <b>t</b> | <b>x,z,-y</b> | <b>Operator: 4 (C<sub>4</sub>)</b> |
|----------|----------|---------------|------------------------------------|
| 1 0 0    | 0.000    |               |                                    |
| 0 0 1    | 0.000    |               |                                    |
| 0 -1 0   | 0.000    |               |                                    |

---

| <b>R</b> | <b>t</b> | <b>z,y,-x</b> | <b>Operator: 4 (C<sub>4</sub>)</b> |
|----------|----------|---------------|------------------------------------|
| 0 0 1    | 0.000    |               |                                    |
| 0 1 0    | 0.000    |               |                                    |
| -1 0 0   | 0.000    |               |                                    |

---

| <b>R</b> | <b>t</b> | <b>-z,y,x</b> | <b>Operator: 4 (C<sub>4</sub>)</b> |
|----------|----------|---------------|------------------------------------|
| 0 0 -1   | 0.000    |               |                                    |
| 0 1 0    | 0.000    |               |                                    |
| 1 0 0    | 0.000    |               |                                    |

---

| <b>R</b> | <b>t</b> | <b>-x,-y,z</b> | <b>Operator: 2 (C<sub>2</sub>)</b> |
|----------|----------|----------------|------------------------------------|
| -1 0 0   | 0.000    |                |                                    |
| 0 -1 0   | 0.000    |                |                                    |
| 0 0 1    | 0.000    |                |                                    |

---

| <b>R</b> | <b>t</b> | <b>x,-y,-z</b> | <b>Operator: 2 (C<sub>2</sub>)</b> |
|----------|----------|----------------|------------------------------------|
| 1 0 0    | 0.000    |                |                                    |
| 0 -1 0   | 0.000    |                |                                    |
| 0 0 -1   | 0.000    |                |                                    |

---

| <b>R</b> | <b>t</b> | <b>-x,y,-z</b> | <b>Operator: 2 (C<sub>2</sub>)</b> |
|----------|----------|----------------|------------------------------------|
| -1 0 0   | 0.000    |                |                                    |
| 0 1 0    | 0.000    |                |                                    |
| 0 0 -1   | 0.000    |                |                                    |

---

| <b>R</b> | <b>t</b> | <b>-x,-y,-z</b> | <b>Operator: 1 (i)</b> |
|----------|----------|-----------------|------------------------|
| -1 0 0   | 0.000    |                 |                        |
| 0 -1 0   | 0.000    |                 |                        |
| 0 0 -1   | 0.000    |                 |                        |

---

| <b>R</b> | <b>t</b> | <b>y,-x,-z</b> | <b>Operator: 4 (S<sub>4</sub>)</b> |
|----------|----------|----------------|------------------------------------|
| 0 1 0    | 0.000    |                |                                    |

-1 0 0 0.000  
0 0 -1 0.000

---

**R**      **t**      **-y,x,-z**      **Operator: 4 (S<sub>4</sub>)**  
0 -1 0 0.000  
1 0 0 0.000  
0 0 -1 0.000

---

**R**      **t**      **-x,z,-y**      **Operator: 4 (S<sub>4</sub>)**  
-1 0 0 0.000  
0 0 1 0.000  
0 -1 0 0.000

---

**R**      **t**      **-x,-z,y**      **Operator: 4 (S<sub>4</sub>)**  
-1 0 0 0.000  
0 0 -1 0.000  
0 1 0 0.000

---

**R**      **t**      **-z,-y,x**      **Operator: 4 (S<sub>4</sub>)**  
0 0 -1 0.000  
0 -1 0 0.000  
1 0 0 0.000

---

**R**      **t**      **z,-y,-x**      **Operator: 4 (S<sub>4</sub>)**  
0 0 1 0.000  
0 -1 0 0.000  
-1 0 0 0.000

---

**R**      **t**      **-z,-x,-y**      **Operator: 3 (S<sub>6</sub>)**  
0 0 -1 0.000  
-1 0 0 0.000  
0 -1 0 0.000

---

**R**      **t**      **-y,-z,-x**      **Operator: 3 (S<sub>6</sub>)**  
0 -1 0 0.000  
0 0 -1 0.000  
-1 0 0 0.000

---

**R**      **t**      **y,z,-x**      **Operator: 3 (S<sub>6</sub>)**  
0 1 0 0.000  
0 0 1 0.000  
-1 0 0 0.000

---

**R**      **t**      **-z,x,y**      **Operator: 3 (S<sub>6</sub>)**  
0 0 -1 0.000  
1 0 0 0.000  
0 1 0 0.000

---

**R**      **t**      **y,-z,x**      **Operator: 3 (S<sub>6</sub>)**

|   |   |    |       |
|---|---|----|-------|
| 0 | 1 | 0  | 0.000 |
| 0 | 0 | -1 | 0.000 |
| 1 | 0 | 0  | 0.000 |

---

|          |          |               |                                    |
|----------|----------|---------------|------------------------------------|
| <b>R</b> | <b>t</b> | <b>z,x,-y</b> | <b>Operator: 3 (S<sub>6</sub>)</b> |
| 0        | 0        | 1             | 0.000                              |
| 1        | 0        | 0             | 0.000                              |
| 0        | -1       | 0             | 0.000                              |

---

|          |          |               |                                    |
|----------|----------|---------------|------------------------------------|
| <b>R</b> | <b>t</b> | <b>-y,z,x</b> | <b>Operator: 3 (S<sub>6</sub>)</b> |
| 0        | -1       | 0             | 0.000                              |
| 0        | 0        | 1             | 0.000                              |
| 1        | 0        | 0             | 0.000                              |

---

|          |          |               |                                    |
|----------|----------|---------------|------------------------------------|
| <b>R</b> | <b>t</b> | <b>z,-x,y</b> | <b>Operator: 3 (S<sub>6</sub>)</b> |
| 0        | 0        | 1             | 0.000                              |
| -1       | 0        | 0             | 0.000                              |
| 0        | 1        | 0             | 0.000                              |

---

|          |          |               |                        |
|----------|----------|---------------|------------------------|
| <b>R</b> | <b>t</b> | <b>x,y,-z</b> | <b>Operator: m (σ)</b> |
| 1        | 0        | 0             | 0.000                  |
| 0        | 1        | 0             | 0.000                  |
| 0        | 0        | -1            | 0.000                  |

---

|          |          |               |                        |
|----------|----------|---------------|------------------------|
| <b>R</b> | <b>t</b> | <b>-x,y,z</b> | <b>Operator: m (σ)</b> |
| -1       | 0        | 0             | 0.000                  |
| 0        | 1        | 0             | 0.000                  |
| 0        | 0        | 1             | 0.000                  |

---

|          |          |               |                        |
|----------|----------|---------------|------------------------|
| <b>R</b> | <b>t</b> | <b>x,-y,z</b> | <b>Operator: m (σ)</b> |
| 1        | 0        | 0             | 0.000                  |
| 0        | -1       | 0             | 0.000                  |
| 0        | 0        | 1             | 0.000                  |

---

|          |          |              |                        |
|----------|----------|--------------|------------------------|
| <b>R</b> | <b>t</b> | <b>z,y,x</b> | <b>Operator: m (σ)</b> |
| 0        | 0        | 1            | 0.000                  |
| 0        | 1        | 0            | 0.000                  |
| 1        | 0        | 0            | 0.000                  |

---

|          |          |                |                        |
|----------|----------|----------------|------------------------|
| <b>R</b> | <b>t</b> | <b>-z,y,-x</b> | <b>Operator: m (σ)</b> |
| 0        | 0        | -1             | 0.000                  |
| 0        | 1        | 0              | 0.000                  |
| -1       | 0        | 0              | 0.000                  |

---

|          |          |              |                        |
|----------|----------|--------------|------------------------|
| <b>R</b> | <b>t</b> | <b>x,z,y</b> | <b>Operator: m (σ)</b> |
| 1        | 0        | 0            | 0.000                  |
| 0        | 0        | 1            | 0.000                  |
| 0        | 1        | 0            | 0.000                  |

---



$$\Gamma_{\text{red}} = A_{1g} + E_g + T_{1g} + 2T_{2g} + 5T_{1u} + T_{2u}$$

**Irreducible representations (Bethe Notation)**

$$\Gamma_{\text{red}} = \Gamma_1^+ + \Gamma_3^+ + \Gamma_4^+ + 2\Gamma_5^+ + 5\Gamma_4^- + \Gamma_5^-$$

**Invariants**

**IR Active - Acoustic Modes (translations)**

$$T_{1u} \quad \Gamma_4^- \quad (x, y, z)$$

**Rotations**

$$T_{1g} \quad \Gamma_4^+ \quad (R_x, R_y, R_z)$$

**Raman Active**

$$A_{1g} \quad \Gamma_1^+ \quad x^2 + y^2 + z^2$$

$$E_g \quad \Gamma_3^+ \quad (2z^2 - x^2 - y^2, x^2 - y^2)$$

$$T_{2g} \quad \Gamma_5^+ \quad (xz, yz, xy)$$

**Silent**

$$T_{2u} \quad \Gamma_5^-$$

## References:

1. Pandey, R.; Gangadhar, S. B.; Grover, S.; Singh, S. K.; Kadam, A.; Ogale, S.; Waghmare, U. V.; Rao, V. R.; Kabra, D. Microscopic Origin of Piezoelectricity in Lead-Free Halide Perovskite: Application in Nanogenerator Design. *ACS Energy Letters* **2019**, *4*, 1004-1011.
2. Mallick, Z., Gupta, V., Jain, A., Bera, C. and Mandal, D., 2022. Utilizing Strain-Engineered Stable Halide Perovskite for Interfacial Interaction with Molecular Dipoles To Enhance Ferroelectric Switching and Piezoresponse in Polymer Composite Nanofibers. *Langmuir*, *39*(1), pp.320-333.
3. Zhang, Y., Parsonnet, E., Fernandez, A., Griffin, S.M., Huyan, H., Lin, C.K., Lei, T., Jin, J., Barnard, E.S., Raja, A. and Behera, P., 2022. Ferroelectricity in a semiconducting all-inorganic halide perovskite. *Science advances*, *8*(6), p.eabj5881.
4. Zhang, Q.; Solanki, A.; Parida, K.; Giovanni, D.; Li, M.; Jansen, T. L.; Pshenichnikov, M. S.; Sum, T. C. Tunable ferroelectricity in Ruddlesden–Popper halide perovskites. *ACS Appl. Mater. Interfaces* **2019**, *11*(14), 13523-13532.
5. Xiao, J.; Chang, J.; Li, B.; Isikgor, F. H.; Wang, D.; Fan, Z.; Lin, Z.; Ouyang, J.; Zeng, K.; Chen, J. Room temperature ferroelectricity of hybrid organic–inorganic perovskites with mixed iodine and bromine. *J. Mater. Chem. A* **2018**, *6*(20), 9665-9676.
6. Wang, Z. X.; Zhang, H.; Wang, F.; Cheng, H.; He, W. H.; Liu, Y. H.; Huang, X. Q.; Li, P. F. Superior transverse piezoelectricity in a halide perovskite molecular ferroelectric thin film. *J. Am. Chem. Soc.* **2020**, *142*(29), 12857-12864.
7. Zhang, H.Y., Song, X.J., Cheng, H., Zeng, Y.L., Zhang, Y., Li, P.F., Liao, W.Q. and Xiong, R.G., 2020. A three-dimensional lead halide perovskite-related ferroelectric. *Journal of the American Chemical Society*, *142*(10), pp.4604-4608.
